# Supplementary material for: Vaccinium virgatum Aiton Leaves Extract Suppressed Lipid Accumulation and Uric Acid Production in 3T3-L1 Adipocytes
Source: MDPI journal article supplement (doi:10.3390/plants10122638), 2021-11-30
Supplement: s1 [file s1]

Supplement Table S1 Primer sequences used for real-time PCR

| Primer                | Sequence (5' to 3')             |
|-----------------------|---------------------------------|
| PPAR $\gamma$ Forward | 5'-GGAAGACCACTCGCATTCCTT-3'     |
| PPAR $\gamma$ Reverse | 5'-GTAATCAGCAACCATTGGGTCA-3'    |
| aP2 Forward           | 5'-CCGCAGACGACAGGA-3'           |
| aP2 Reverse           | 5'-CTCATGCCCTTTCATAAACT-3'      |
| HSL Forward           | 5'-GGCTCACAGTTACCATCTCACC-3'    |
| HSL Reverse           | 5'-GAGTACCTTGCTGTCCTGTCC-3'     |
| LPL Forward           | 5'-CATCGAGAGGATCCGAGTGAA-3'     |
| LPL Reverse           | 5'-TGCTGAGTCCTTCCCTTCTG-3'      |
| GAPDH Forward         | 5'-GTGTACATGGTTCCAGTATGACTCC-3' |
| GAPDH Reverse         | 5'-AGTGAGTTGTCATATTTCTCGTGGT-3' |

PPAR $\gamma$ ; peroxisome proliferator activated receptor  $\gamma$

aP2; Adipocyte fatty acid-binding protein 2

HSL; Hormone-sensitive lipase

LPL; Lipoprotein lipase

GAPDH; Glyceraldehyde-3-phosphate dehydrogenase.
